# Supplementary material
Source: HighWire-hosted journal article supplement (https://svn.smart01.highwire.org/content/5/2/138)
Supplement: inline-supplementary-material-1 [file inline-supplementary-material-1.pdf]

**Supplemental Table.** Comparison of carotid plaque between subjects included and excluded

|                                           | Mean $\pm$ SD, n (%) or Median |                              | <i>p</i> -value * |
|-------------------------------------------|--------------------------------|------------------------------|-------------------|
|                                           | Included subjects<br>(n=119)   | Excluded subjects<br>(n=465) |                   |
| <b>Carotid Morphology</b>                 |                                |                              |                   |
| Mean lumen area, mm <sup>2</sup>          | 54.3 $\pm$ 16.9                | 44.4 $\pm$ 15.6              | < 0.001           |
| Mean wall area, mm <sup>2</sup>           | 35.4 $\pm$ 12.8                | 32.3 $\pm$ 11.6              | 0.011             |
| Mean total vessel area, mm <sup>2</sup>   | 89.6 $\pm$ 22.4                | 76.7 $\pm$ 21.2              | < 0.001           |
| Mean wall thickness, mm                   | 1.19 $\pm$ 0.41                | 1.19 $\pm$ 0.39              | 0.994             |
| Mean normalized wall index, %             | 40.4 $\pm$ 9.9                 | 42.4 $\pm$ 9.9               | 0.049             |
| <b>Presence of Plaque Components</b>      |                                |                              |                   |
| Calcification                             | 47 (39.5)                      | 192 (41.3)                   | 0.722             |
| Lipid-rich necrotic core                  | 69 (58.0)                      | 307 (66.0)                   | 0.071             |
| Intraplaque hemorrhage                    | 12 (10.1)                      | 75 (16.1)                    | 0.098             |
| Luminal Surface disruption                | 11 (9.2)                       | 37 (8.0)                     | 0.648             |
| High-risk plaque                          | 19 (16.0)                      | 113 (24.3)                   | 0.052             |
| <b>Volume of Plaque Components †</b>      |                                |                              |                   |
| Calcification, mm <sup>3</sup>            | 10.0                           | 16.2                         | 0.430             |
| Lipid-rich necrotic core, mm <sup>3</sup> | 31.0                           | 59.9                         | 0.128             |

SD: standard deviation. \* *P*-values are Mann-Whitney U test or Chi-square test between subjects included and excluded. † Only subjects with the corresponding component present were included in the comparison.
